# Supplementary material for: Room temperature light-induced recrystallization of Cu2O cubes to CuO nanostructures in water
Source: Royal Society of Chemistry journal article supplement (doi:10.1039/c4ce01174k), 2014-01-01
Supplement: c4ce01174k1.pdf [file c4ce01174k1.pdf]

## Supporting Information

### Room Temperature Light-Induced Recrystallization of Cu<sub>2</sub>O Cubes to CuO Nanostructures in Water

Yuri Na,<sup>1</sup> Sungwoo Lee,<sup>2</sup> Nitish Roy,<sup>3</sup> Debabrata Pradhan,<sup>3,\*</sup> and Youngku Sohn<sup>1,\*</sup>

<sup>1</sup>Department of Chemistry, Yeungnam University, Gyeongsan 712-749, Republic of Korea

<sup>2</sup>Center for Research Facilities, Chungnam National University, Daejeon 305-764, Republic of Korea

<sup>3</sup>Materials Science Centre, Indian Institute of Technology, Kharagpur 721 302, W.B., India

\* Corresponding author e-mail: [youngkusohn@ynu.ac.kr](mailto:youngkusohn@ynu.ac.kr), [deb@matssc.iitkgp.ernet.in](mailto:deb@matssc.iitkgp.ernet.in)

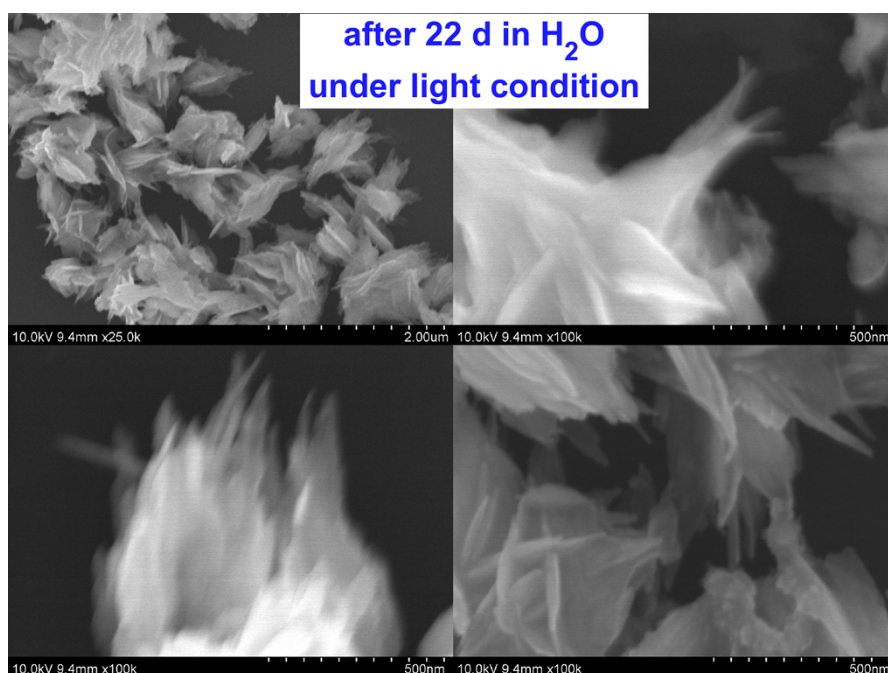

**Figure S1.** SEM images of Cu oxide samples stored in water with light exposure for 22days.

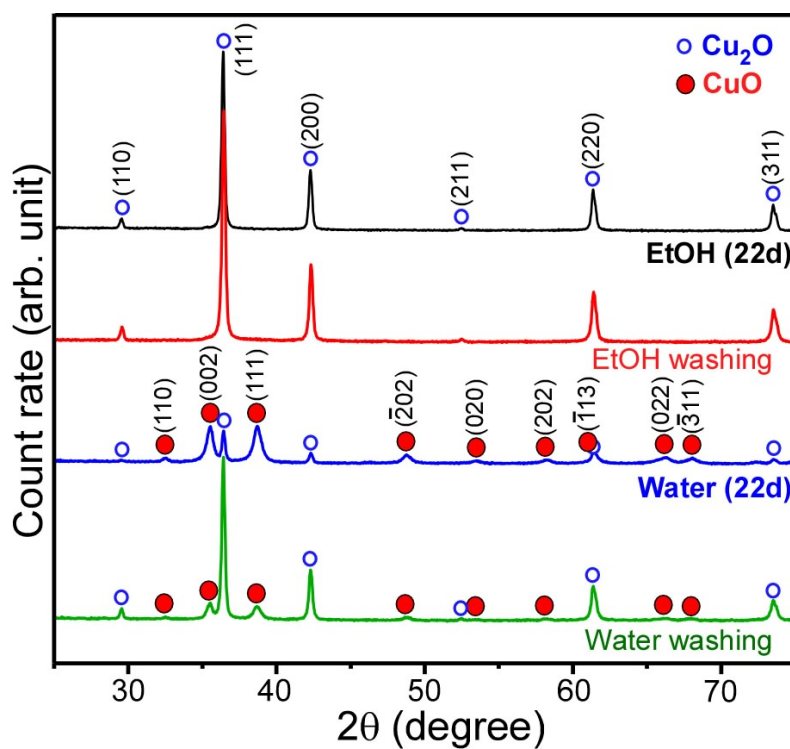

**Figure S2.** Powder X-ray diffraction patterns of as-prepared Cu oxide samples washed only with ethanol or water, and for the samples stored in ethanol or water for 22 days with light exposure.

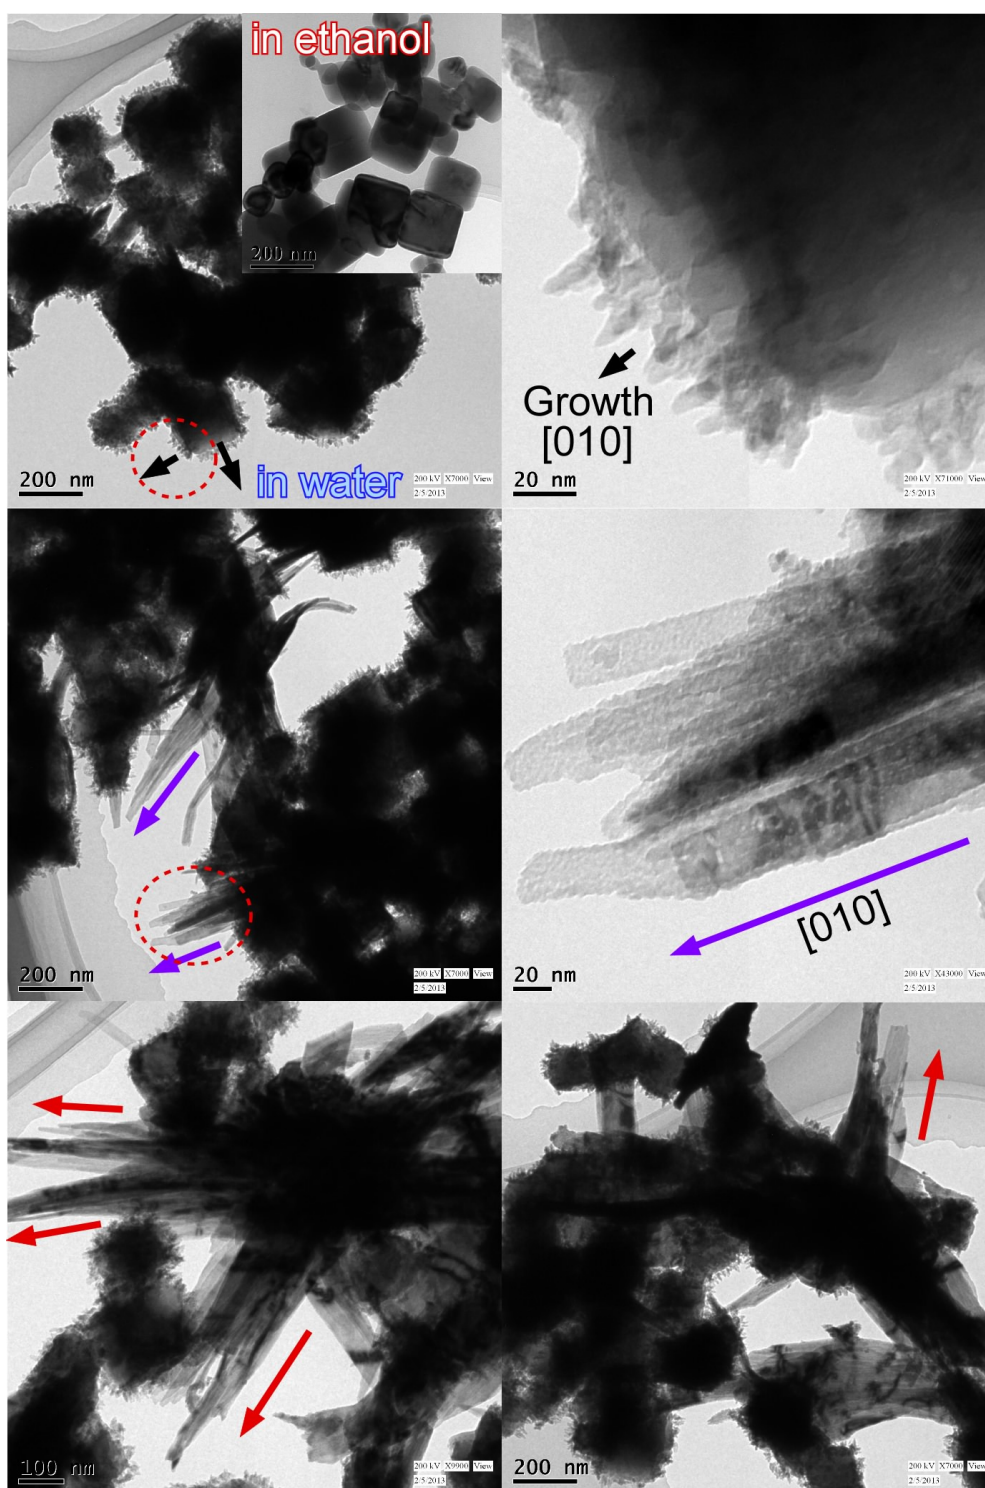

**Figure S3.** TEM images of Cu oxide samples stored in water with light exposure. Inset (top left) shows the TEM image of Cu<sub>2</sub>O cubes stored in ethanol. Other TEM images clearly reveal outward CuO growth in water under visible light irradiation.

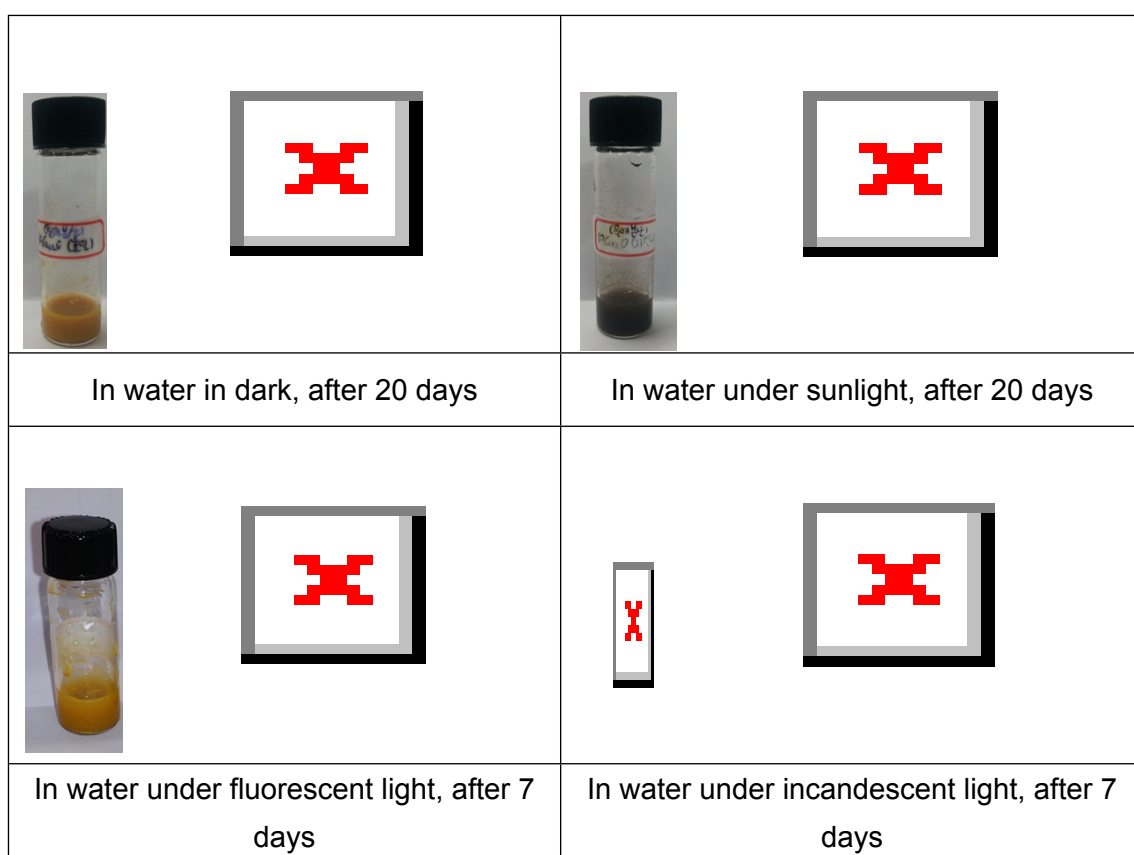

**Figure S4.** Photographs and SEM images of Cu oxide samples in dark (top left), and under sun (top right), fluorescent (bottom left), and incandescent (bottom right) light.

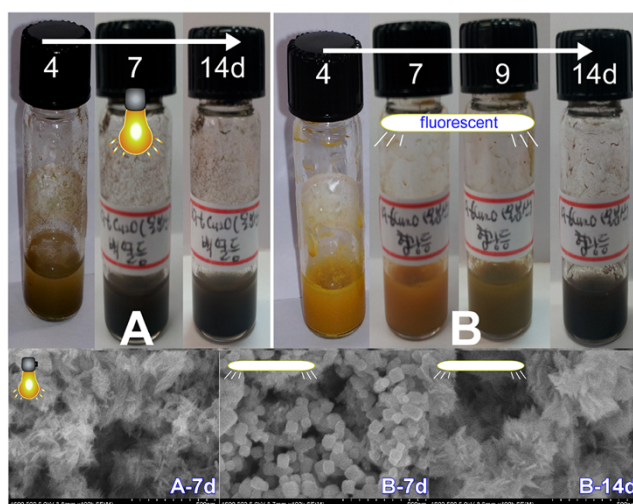

**Figure S5.** Change in color of water containing  $\text{Cu}_2\text{O}$  cubes upon irradiation of incandescent (A), fluorescent (B) light, A-7d: SEM image of sample A after 7 days. B-7d and B-14d: SEM images of sample B after 7 and 14 days, respectively.

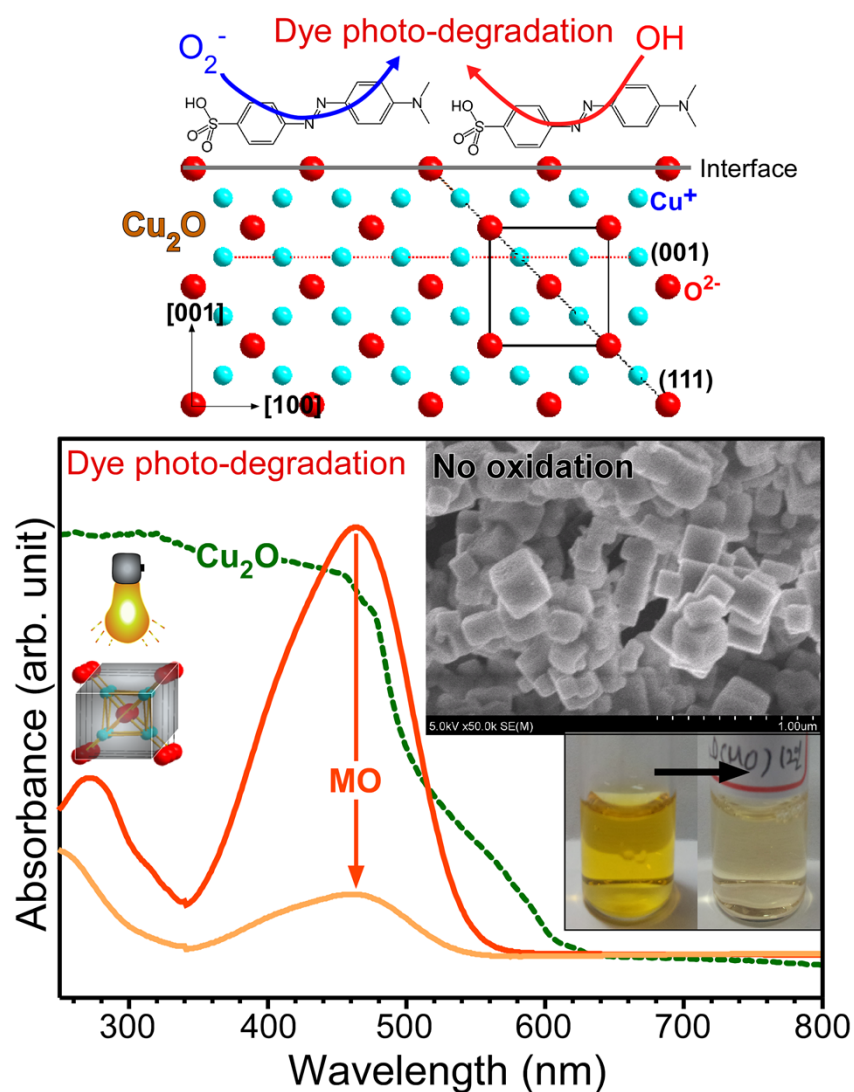

**Figure S6.** Change in UV-vis absorption spectra and color of MO solution with  $\text{Cu}_2\text{O}$  cubes in water upon irradiation of incandescent light. SEM images of  $\text{Cu}_2\text{O}$  cubes after the dye-degradation experiment.



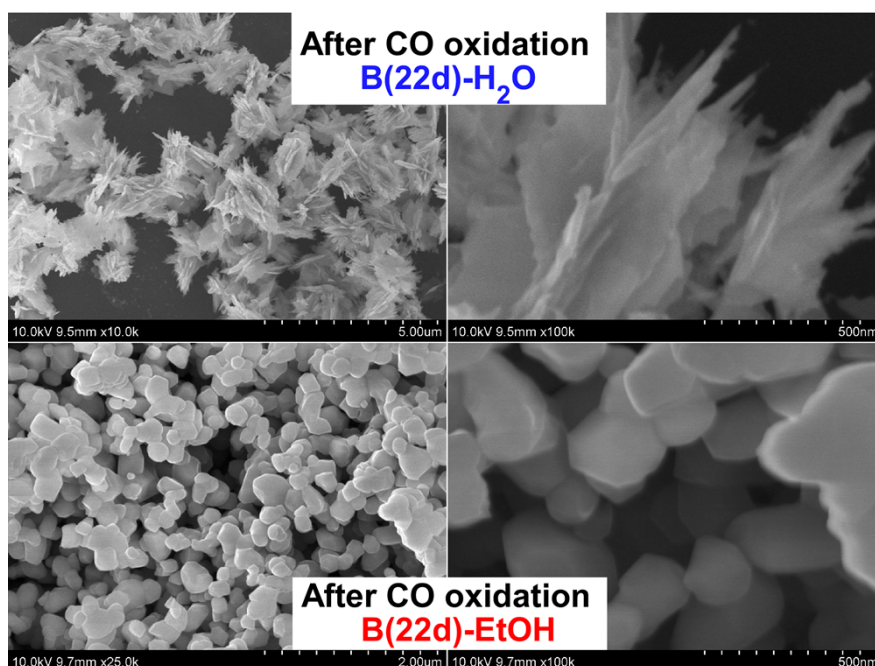

**Figure S7.** SEM images of Cu oxide samples stored in water (top) and ethanol (bottom) for 22 days with light exposure after CO oxidation experiments.

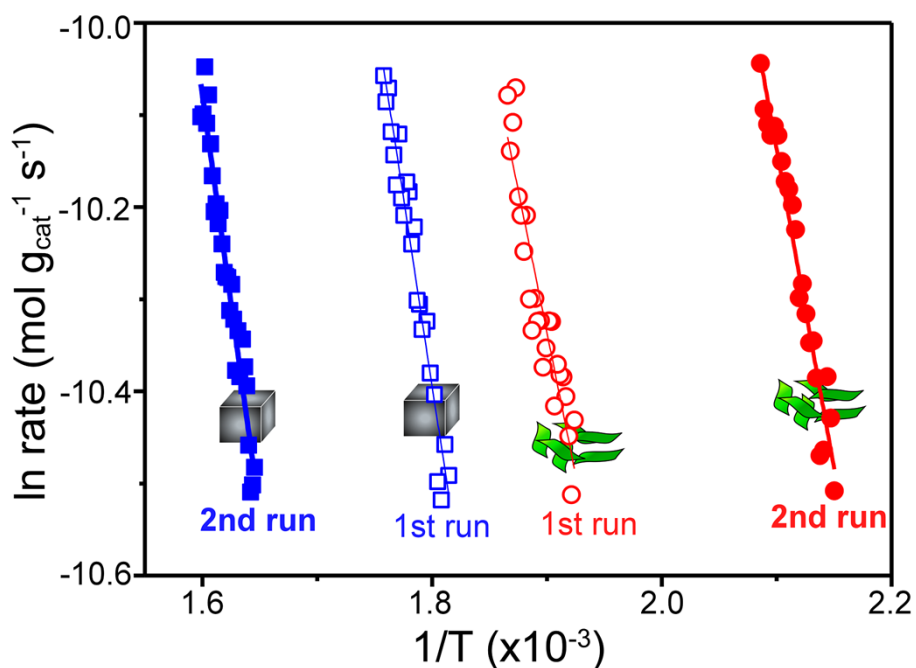

**Figure S8.** Arrhenius plots for the 1st and 2nd CO oxidation runs over the samples stored in ethanol (cubes) and water (nanoribbons) for 22 days with light exposure.
